# Supplementary material for: Comparative Metabolite Profiling of Wheat Cultivars (Triticum aestivum) Reveals Signatory Markers for Resistance and Susceptibility to Stripe Rust and Aluminium (Al3+) Toxicity
Source: MDPI journal article supplement (doi:10.3390/metabo12020098), 2022-01-20
Supplement: s1 [file s1]

Supplementary material

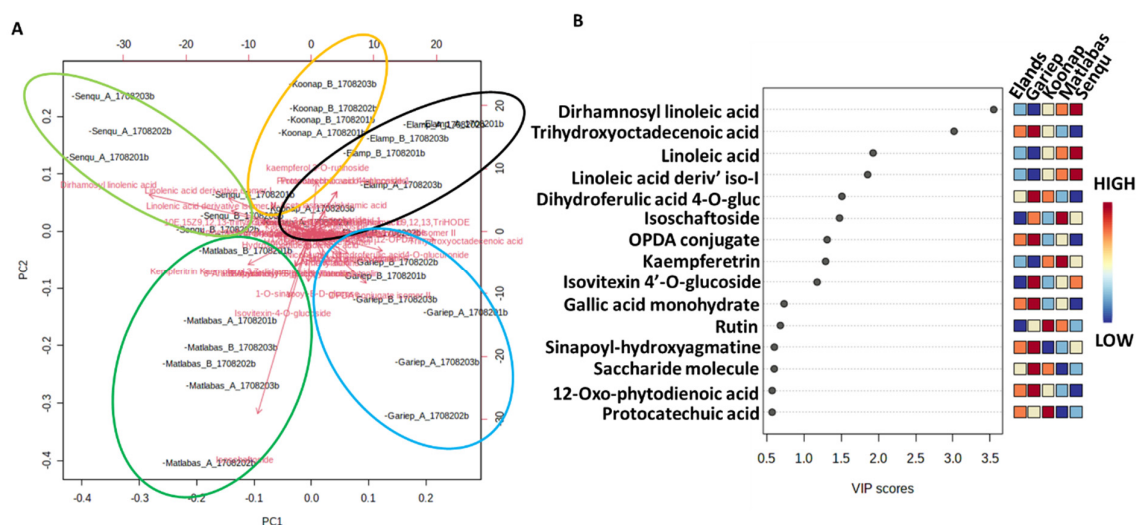

**Figure S1.** Distribution of significant metabolites. (A) A bi-plot metabolite distribution per cultivar and (B) VIP scores. The VIP scores plot revealed discriminating metabolite features from the classes of fatty acids and phenolics to play essential roles in the differential clustering of the wheat varieties in A. The coloured boxes to the right of the VIP score indicate the relative concentration of each metabolite in the respective cultivars, and the represented metabolites possess a VIP score of 0.5 or higher. The most discriminating metabolites originated from the fatty acids and phenolic classes possessing a VIP of 1 and above, with dirhamnosyl linoleic acid presenting the highest VIP score of 3.5.

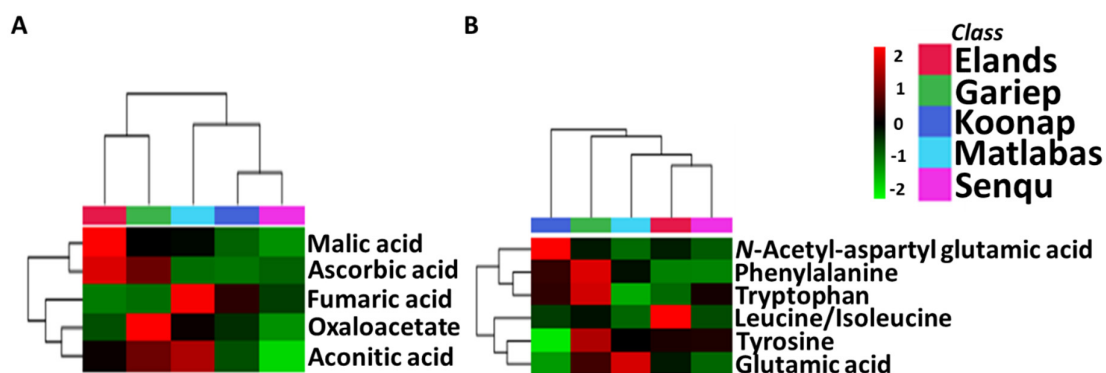

**Figure S2.** Distribution of annotated metabolites among five wheat cultivars: A and B shows the distribution of selected annotated metabolites among five wheat cultivars according to class. Samples are projected in columns with the metabolites in rows. The data was Pareto scaled in [32]. Colour coding indicates abundance (red = high abundance, green = low abundance). Some metabolites are found in high abundance in some cultivars and very low abundance in other cultivars.

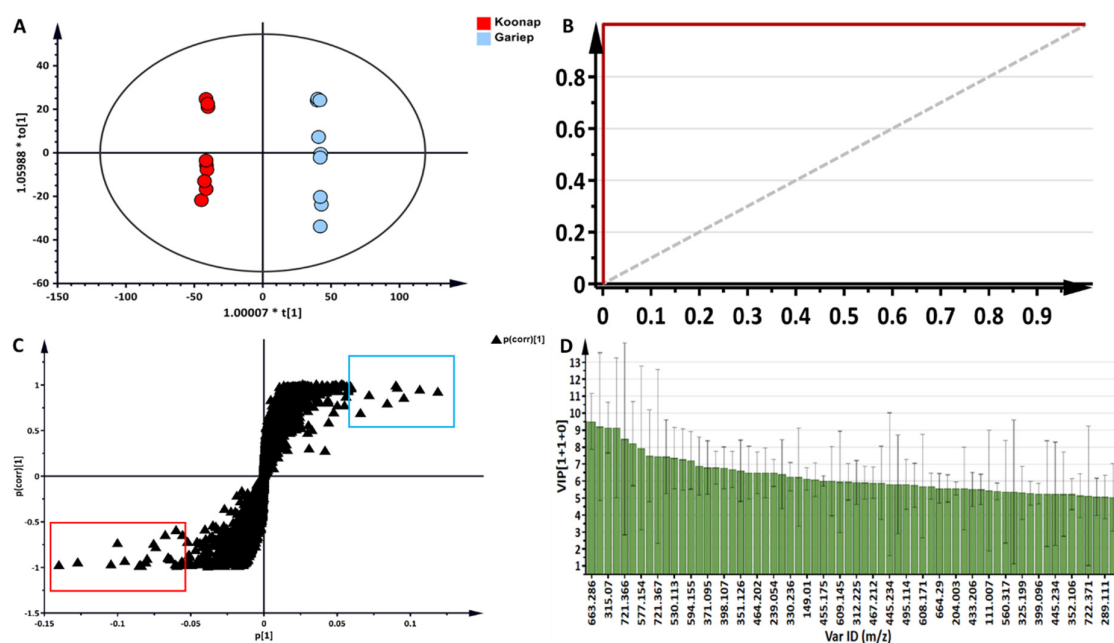

**Figure S3.** Supervised OPLS-DA statistical analysis and significant feature extraction of ESI negative data of methanolic extracts from leaf tissues (A): An OPLS-DA scores plot of respective *Pst* and  $Al^{3+}$  susceptible and resistant 'Gariep' vs. 'Koonap' cultivars. The model represented is 1+1+0 components with  $R^2X$  of 0.464,  $R^2Y$  of 0.999 and  $Q^2(cum)$  of 0.985. (B): A receiver operator characteristic (ROC) plot was used to evaluate the sensitivity and specificity of the OPLS-DA, the ROC shows ~100% sensitivity and specificity of the model. (C): An OPLS-DA S-plot corresponding to the = model in A and shows discriminating variables between the selected cultivars (demarcated in red and blue rectangles) identified as significant discriminant variables. The significance of the variables selected in (C) was evaluated with the VIP score plot (D), with only variables displaying a VIP score of more than one considered significant.

**Table S1.** Dryland wheat varieties sourced from different summer rainfall regions. The wheat varieties used in this study display varying characteristics of susceptibility and resistance to stripe rust caused by *Puccinia striiformis* f. sp. *tritici* (*Pst*) and Aluminium toxicity.

| Variety  | Dryland wheat varieties for the summer rainfall region |              |                        |                    |
|----------|--------------------------------------------------------|--------------|------------------------|--------------------|
|          | Planting date                                          | Growth-type  | <i>Pst</i>             | Aluminium toxicity |
| Elands   | July                                                   | Intermediate | Moderately susceptible | Susceptible        |
| Matlabas | June                                                   | Winter       | Susceptible            | Susceptible        |
| Koonap   | July/August                                            | Intermediate | Resistant              | Resistant          |
| Senqu    | July                                                   | Intermediate | Resistant              | Susceptible        |
| Gariep   | July                                                   | Intermediate | Susceptible            | Susceptible        |

**Table S2.** Summary of the annotated, putatively identified metabolites (MSI-L2) from 5 wheat cultivars. The qualitative and quantitative distribution of the metabolites is depicted in the heatmap (Figure 2B), and the classification of the metabolites is graphically represented in the sunburst plot (Figure 2A).

| No. | Compound                                  | Chemical Formula | Rt (min) | Theoretic al mass | Experiment al mass | Ionisation mode | Parent ion         | Fragments (m/z)              |
|-----|-------------------------------------------|------------------|----------|-------------------|--------------------|-----------------|--------------------|------------------------------|
| 1   | L-Arginine                                | C6H15N4O2        | 0.75     | 175.1189          | 175.1025           | Positive        | [M+H] <sup>+</sup> | 158, 130, 118, 116           |
| 2   | Choline                                   | C5H14NO          | 0.86     | 104.1708          | 104.1062           | Positive        | [M+H] <sup>+</sup> | 60,                          |
| 3   | Adenine                                   | C5H5N5           | 0.92     | 135.1267          | 136.0658           | Positive        | [M+H] <sup>+</sup> | 118,                         |
| 4   | Citraconic acid                           | C5H6O4           | 0.98     | 130.0987          | 129.0194           | Negative        | [M-H] <sup>-</sup> | 85                           |
| 5   | Malic acid                                | C4H6O5           | 1.04     | 134.0874          | 133.0127           | Negative        | [M-H] <sup>-</sup> | 191, 115                     |
| 6   | Quinic acid                               | C7H12O6          | 1.24     | 192.1666          | 191.0182           | Negative        | [M-H] <sup>-</sup> | 173, 111                     |
| 7   | Aconitic acid                             | C6H6O6           | 1.28     | 174.1080          | 173.0889           | Negative        | [M-H] <sup>-</sup> | 129, 117, 85                 |
| 8   | Indoline                                  | C8H9N            | 1.85     | 119.1638          | 120.0814           | Positive        | [M+H] <sup>+</sup> | 103,                         |
| 9   | L-Phenylalanine                           | C9H11NO2         | 2.03     | 165.1891          | 164.0706           | Negative        | [M-H] <sup>-</sup> | 147, 129, 103                |
| 10  | Protocatechuic acid-4-glucoside           | C13H16O9         | 2.18     | 316.2620          | 315.0755           | Negative        | [M-H] <sup>-</sup> | 153, 108                     |
| 11  | Pantothenic acid                          | C9H17NO5         | 2.23     | 219.2350          | 220.1169           | Positive        | [M+H] <sup>+</sup> | 185, 116, 90                 |
| 12  | Alanylleucine                             | C9H18N2O3        | 2.54     | 202.2540          | 203.1404           | Positive        | [M+H] <sup>+</sup> | 157, 132, 86                 |
| 13  | Indole-3-carboxaldehyde                   | C9H7NO           | 2.98     | 145.1580          | 146.0616           | Positive        | [M+H] <sup>+</sup> | 118, 91                      |
| 14  | 3-(3,4,5-Trihydroxyphenyl) propanoic acid | C9H10O5          | 3.20     | 198.1740          | 197.0412           | Negative        | [M-H] <sup>-</sup> | 153, 151, 138, 123, 109      |
| 15  | L-Valine                                  | C5H11NO2         | 3.35     | 117.1463          | 118.0868           | Positive        | [M+H] <sup>+</sup> | 70, 55                       |
| 16  | L-Tryptophan                              | C11H12N2O2       | 3.37     | 205.0971          | 205.0968           | Positive        | [M+H] <sup>+</sup> | 188, 146, 118                |
| 17  | L-Leucine/Isoleucine                      | C6H13NO2         | 3.87     | 132.8054          | 132.0865           | Positive        | [M+H] <sup>+</sup> | 86, 69                       |
| 18  | L-Glutamic acid                           | C5H9NO4          | 4.19     | 147.1293          | 148.0580           | Positive        | [M+H] <sup>+</sup> | 130, 84, 72                  |
| 19  | Coumarin                                  | C9H6O2           | 4.19     | 146.1450          | 147.0470           | Positive        | [M+H] <sup>+</sup> | 103, 91                      |
| 20  | L-Tyrosine                                | C9H11NO3         | 4.24     | 181.1885          | 182.0807           | Positive        | [M+H] <sup>+</sup> | 165, 136, 147, 123, 119, 91  |
| 21  | Feruloyl agmatine                         | C15H22N4O3       | 4.71     | 306.3602          | 307.1698           | Positive        | [M+H] <sup>+</sup> | 307, 273, 177, 145           |
| 22  | Ferulic acid                              | C10H9O3          | 4.82     | 194.1840          | 177.0552           | Positive        | [M+H] <sup>+</sup> | 145, 117, 89                 |
| 23  | Cyclomethyltryptophan                     | C12H12N2O2       | 5.08     | 216.2359          | 217.0977           | Positive        | [M+H] <sup>+</sup> | 144,                         |
| 24  | Feruloyl putrescine                       | C14H20N2O3       | 5.19     | 264.3202          | 265.1552           | Positive        | [M+H] <sup>+</sup> | 248, 177, 145                |
| 25  | Tri (ethyl carbonate)                     | C16H18O11        | 5.37     | 386.1547          | 385.0782           | Negative        | [M-H] <sup>-</sup> | 297, 89                      |
| 26  | N-Feruloyl spermidine                     | C17H28N3O3       | 5.77     | 321.2177          | 322.1654           | Positive        | [M+H] <sup>+</sup> | 321, 177, 163, 146, 117, 89  |
| 27  | 3-Indole acrylic acid                     | C11H9NO2         | 5.80     | 187.1947          | 188.0712           | Positive        | [M+H] <sup>+</sup> | 146, 144, 118, 102, 72       |
| 28  | 3-Feruloyl quinic acid                    | C17H20O9         | 5.91     | 368.1107          | 367.0970           | Negative        | [M-H] <sup>-</sup> | 351, 219, 193, 178, 134, 102 |
| 29  | 3-Feruloyl quinic acid isomer             | C17H20O9         | 5.92     | 368.3353          | 367.1045           | Negative        | [M-H] <sup>-</sup> | 193, 134                     |
| 30  | Coumaroyl agmatine                        | C14H20N4O2       | 6.24     | 276.3342          | 277.1623           | Positive        | [M+H] <sup>+</sup> | 260, 218, 147, 145, 131, 114 |

|    |                                                                 |            |       |          |          |          |        |                                                       |
|----|-----------------------------------------------------------------|------------|-------|----------|----------|----------|--------|-------------------------------------------------------|
| 31 | 2-O-Glucosyl-7-methoxy-1,4(2H)-benzoxazin-3-one (HMBOA + O-Hex) | C15H19NO9  | 7.17  | 357.3127 | 356.0978 | Negative | [M-H]- | 300, 194, 166, 138                                    |
| 32 | Saccharide compound                                             | C16H20O10  | 7.29  | 372.3200 | 371.0976 | Negative | [M-H]- | 249, 231, 121, 113                                    |
| 33 | Nicoblumin                                                      | C25H42O13  | 7.31  | 550.6000 | 549.2547 | Negative | [M-H]- | 387, 227                                              |
| 34 | N-Feruloyl agmatine                                             | C15H22N4O3 | 8.05  | 306.3602 | 307.1725 | Positive | [M+H]+ | 290, 248, 247, 178, 177, 145, 117, 114, 95            |
| 35 | N-Acetyl-aspartyl glutamic acid                                 | C11H16N2O8 | 8.06  | 304.2550 | 303.0820 | Negative | [M-H]- | 303, 96                                               |
| 36 | 4-acetyl-2(3H)-Benzoxazolone (ABOA)                             | C9H7NO3    | 8.11  | 177.1568 | 178.0497 | Positive | [M+H]+ | 150, 122, 95, 86                                      |
| 37 | Sinapoyl hydroxyagmatine                                        | C16H24N4O5 | 8.59  | 352.1470 | 351.1268 | Negative | [M-H]- | 249, 101                                              |
| 38 | Luteolin-6-C-hexoside-O-hexoside                                | C27H30O16  | 8.88  | 610.5200 | 611.1612 | Positive | [M+H]+ | 449, 451, 413, 329                                    |
| 39 | Dihydroferulic acid 4-O-glucuronide                             | C16H20O10  | 9.25  | 372.3240 | 371.0978 | Negative | [M-H]- | 195, 175                                              |
| 40 | Luteolin-C-hexoside-C-pentoside Isomer                          | C26H28O15  | 9.61  | 580.1428 | 579.1350 | Negative | [M-H]- | 489, 459, 399, 369, 339                               |
| 41 | 1-O-Sinapoyl-β-D-glucose                                        | C17H22O10  | 9.81  | 386.1213 | 385.1135 | Negative | [M-H]- | 223, 164                                              |
| 42 | 8-Arabinosyl-6-glucosylluteolin                                 | C26H28O15  | 9.96  | 580.4915 | 579.1332 | Negative | [M-H]- | 561, 489, 459, 399                                    |
| 43 | Kaempferol-3-O-galactoside-7-O-rhamnoside                       | C27H30O15  | 10.11 | 594.5181 | 593.1525 | Negative | [M-H]- | 447, 283                                              |
| 44 | Luteolin-6-C-hexosyl-O-hexoside                                 | C27H30O16  | 10.15 | 610.1585 | 611.1700 | Positive | [M+H]+ | 593, 575, 545, 461, 431, 413, 395, 383, 353, 329, 299 |
| 45 | Kaempferol-3-O-rutinoside                                       | C27H30O15  | 10.45 | 594.5181 | 593.1498 | Negative | [M-H]- | 447, 300, 285, 284                                    |
| 46 | Isovitexin-7-O-glucoside                                        | C27H30O15  | 10.45 | 594.5181 | 593.1506 | Negative | [M-H]- | 473, 431, 341, 311,                                   |
| 47 | Quercetin-3-O-pentosyl-pentoside                                | C25H26O15  | 10.46 | 566.5000 | 565.1477 | Negative | [M-H]- | 447, 309, 285                                         |
| 48 | Hordatine-C-hexose isomer I                                     | C44H33O16  | 10.52 | 772.2131 | 771.2019 | Negative | [M-H]- | 771, 609, 593, 503, 473                               |
| 49 | Rutin                                                           | C27H30O16  | 10.54 | 610.5175 | 609.1469 | Negative | [M-H]- | 593, 447, 309, 285                                    |
| 50 | Apigenin C-hexoside-C-pentoside                                 | C26H28O14  | 10.60 | 564.4921 | 565.1557 | Positive | [M+H]+ | 547, 529, 511                                         |
| 51 | Schaftoside                                                     | C26H27O14  | 10.61 | 564.4921 | 565.1670 | Positive | [M+H]+ | 427, 409, 379, 337, 325                               |
| 52 | Sinapoyl aldehyde                                               | C11H12O4   | 10.84 | 208.2106 | 209.0797 | Positive | [M+H]+ | 181, 177, 121                                         |
| 53 | Isoschaftoside                                                  | C26H28O14  | 10.86 | 564.4921 | 563.1401 |          | [M-H]- | 473; 353; 325                                         |
| 54 | Luteolin-C-hexoside-O-deoxyhexoside                             | C27H30O15  | 10.86 | 594.5181 | 595.1663 | Positive | [M+H]+ | 449, 431, 383, 353, 329, 299                          |
| 55 | Luteolin-6-C-glucoside                                          | C21H20O11  | 10.86 | 448.3800 | 447.0917 | Positive | [M+H]+ | 431, 413, 353, 329, 299                               |

|    |                                                             |           |       |          |          |          |                    |                                             |
|----|-------------------------------------------------------------|-----------|-------|----------|----------|----------|--------------------|---------------------------------------------|
| 56 | Kaempferol-3-neohesperidoside                               | C27H30O15 | 10.87 | 594.5000 | 595.1775 | Positive | [M+H] <sup>+</sup> | 449, 299, 229,                              |
| 57 | Iso-orientin                                                | C21H20O11 | 11.16 | 448.3769 | 447.0927 | Negative | [M-H] <sup>-</sup> | 429, 357, 327, 285                          |
| 58 | Apigenin-6-C-glucosyl-8-C-(2''-O-dihydroferuloyl)-glucoside | C34H28O21 | 11.37 | 772.5830 | 771.2049 | Negative | [M-H] <sup>-</sup> | 593, 503, 473, 383                          |
| 59 | Kaempferol-3-O-glucoside                                    | C21H20O11 | 11.40 | 448.3769 | 447.0907 | Negative | [M-H] <sup>-</sup> | 285, 284, 255, 227                          |
| 60 | 4-Coumaric acid                                             | C9H8O3    | 11.44 | 164.1580 | 165.0531 | Positive | [M+H] <sup>+</sup> | 145, 123, 119, 103, 89, 69                  |
| 61 | Loliolide                                                   | C11H16O3  | 11.58 | 196.2429 | 197.1178 | Positive | [M+H] <sup>+</sup> | 179, 161, 133, 107                          |
| 62 | 6,8-di-C-glucosyl apigenin                                  | C27H30O15 | 11.62 | 594.5181 | 593.1506 | Negative | [M-H] <sup>-</sup> | 575, 473, 372                               |
| 63 | Chrysoeriol-O-hexoside-C-hexoside                           | C28H32O16 | 11.78 | 624.5480 | 625.1769 | Positive | [M+H] <sup>+</sup> | 463, 445, 427, 409, 397, 367, 343, 313      |
| 64 | Apigenin-6-C-glucoside                                      | C21H20O10 | 11.84 | 432.1056 | 433.1135 | Positive | [M+H] <sup>+</sup> | 415, 397, 379, 349, 337, 313, 283           |
| 65 | Kaempferol-3-O-rhamnoside-7-O-rhamnoside                    | C27H30O14 | 11.91 | 578.1635 | 577.1519 | Negative | [M-H] <sup>-</sup> | 431                                         |
| 66 | Vitexin-2''-O-rhamnoside                                    | C27H30O14 | 11.93 | 578.5187 | 579.1659 | Positive | [M+H] <sup>+</sup> | 433, 415, 397, 367, 313, 204                |
| 67 | Isovitexin                                                  | C21H20O10 | 11.93 | 432.3775 | 433.1105 | Positive | [M+H] <sup>+</sup> | 415, 397, 367, 313, 204                     |
| 68 | Kaempferitrin                                               | C27H30O14 | 12.13 | 578.5230 | 577.1557 | Negative | [M-H] <sup>-</sup> | 563, 453, 431, 413, 355, 341, 293, 283      |
| 69 | Chrysoeriol-O-deoxyhexoside-C-hexoside                      | C28H32O15 | 12.28 | 608.5000 | 609.1819 | Positive | [M+H] <sup>+</sup> | 463, 445, 427, 409, 397, 367, 343, 313      |
| 70 | Chrysoeriol-6-C-glucoside                                   | C22H22O11 | 12.28 | 462.1162 | 463.1240 | Positive | [M+H] <sup>+</sup> | 445, 427, 409, 397, 391, 379, 367, 343, 313 |
| 71 | Chrysoeriol-O-hexoside                                      | C22H22O11 | 12.29 | 462.1162 | 463.1240 | Positive | [M+H] <sup>+</sup> | 301                                         |
| 72 | Diosmetin-7-rutinoside                                      | C28H32O15 | 12.31 | 608.5447 | 609.1820 | Positive | [M+H] <sup>+</sup> | 463,                                        |
| 73 | 3-Phenyl lactic acid                                        | C19H10O3  | 12.37 | 166.1739 | 165.0552 | Negative | [M-H] <sup>-</sup> | 147, 119, 103, 73, 59                       |
| 74 | p-Coumaraldehyde                                            | C9H8O2    | 12.42 | 148.1590 | 147.0430 | Negative | [M-H] <sup>-</sup> | 119, 103, 59                                |
| 75 | Isoorientin-7-O-glucoside                                   | C27H30O16 | 13.01 | 610.5175 | 611.1570 | Positive | [M+H] <sup>+</sup> | 449, 431, 383, 353, 329, 299                |
| 76 | Luteolin-C-[pentosyl-O-(feruoyl-O-hexoside)]                | C36H36O18 | 13.02 | 756.1900 | 757.2074 | Positive | [M+H] <sup>+</sup> | 449, 431, 413, 309, 177                     |
| 77 | Chrysoeriol-O-hexoside C-(O-feruoyl-hexoside)               | C38H40O19 | 13.02 | 800.7140 | 801.230  | Positive | [M+H] <sup>+</sup> | 463, 445, 117                               |
| 78 | Tricin-7-O-deoxyhexosyl-O-hexoside                          | C29H34O16 | 13.22 | 638.6120 | 639.1925 | Positive | [M+H] <sup>+</sup> | 493, 331                                    |
| 79 | Tricin-7-O-hexoside                                         | C23H24O12 | 13.57 | 492.4102 | 493.1330 | Positive | [M+H] <sup>+</sup> | 331                                         |
| 80 | Gallic acid monohydrate                                     | C9H16O4   | 13.71 | 188.1300 | 187.0951 | Negative | [M-H] <sup>-</sup> | 169, 125                                    |

|     |                                                             |            |       |          |          |          |                    |                                            |
|-----|-------------------------------------------------------------|------------|-------|----------|----------|----------|--------------------|--------------------------------------------|
| 81  | Caffeoyl ic acid                                            | C9H7O3     | 13.85 | 163.0395 | 163.1123 | Positive | [M+H] <sup>+</sup> | 145, 135, 117, 89                          |
| 82  | Isovitexin-6"-O-glucoside                                   | C27H30O15  | 14.11 | 594.5100 | 595.1630 | Positive | [M+H] <sup>+</sup> | 595, 433, 415, 367, 337, 313, 283          |
| 83  | Tricin-7-O-hexoside malonylated                             | C26H26O15  | 14.55 | 578.4770 | 577.1300 | Positive | [M+H] <sup>+</sup> | 493, 331                                   |
| 84  | Luteolin-O-(O-caffeoyl-hexoside) C-hexoside                 | C36H36O19  | 15.58 | 772.6700 | 773.1929 | Positive | [M+H] <sup>+</sup> | 449, 431, 329                              |
| 85  | (10E,15Z)-9,12,13-trihydroxyoctadeca-10,15-dienoic isomer I | C18H32O5   | 17.27 | 328.4436 | 327.2171 | Negative | [M-H] <sup>-</sup> | 229, 211, 183, 171, 113                    |
| 86  | Trihydroxyoctadecenoic acid                                 | C18H34O5   | 17.93 | 330.5000 | 329.2296 | Negative | [M-H] <sup>-</sup> | 229, 211                                   |
| 87  | 9-Hydroxy-12-oxo-10(E),15(Z)-octadecadienoic acid isomer I  | C18H30O4   | 18.07 | 310.4340 | 309.2078 | Negative | [M-H] <sup>-</sup> | 291, 197                                   |
| 88  | (10E,15Z)-9,12,13-Trihydroxy-10,15-octadecadienoic acid     | C18H32O5   | 19.00 | 328.4490 | 327.2015 | Negative | [M-H] <sup>-</sup> | 307, 291, 227, 213, 209, 185, 155          |
| 89  | Linolenic acid derivative isomer III                        | C30H38O3   | 20.05 | 446.6000 | 445.2310 | Negative | [M-H] <sup>-</sup> | 311, 293, 277                              |
| 90  | 12-Oxo-phytodienoic acid (12-OPDA)                          | C18H28O3   | 20.12 | 292.4131 | 291.1910 | Negative | [M-H] <sup>-</sup> | 273, 247, 209, 165                         |
| 91  | OPDA conjugate isomer II                                    | C18H30O4   | 20.14 | 310.4000 | 309.1913 | Negative | [M-H] <sup>-</sup> | 291, 273, 247, 209, 165                    |
| 92  | N-Sinapoyl putrescine                                       | C15H22N2O4 | 20.76 | 294.3462 | 295.2245 | Positive | [M+H] <sup>+</sup> | 207, 175, 147, 119                         |
| 93  | 9-Hydroxy-12-oxo-10(E),15(Z)-octadecadienoic acid isomer II | C18H32O3   | 20.96 | 296.4000 | 295.2256 | Negative | [M-H] <sup>-</sup> | 291, 247, 165                              |
| 94  | Linolenic acid                                              | C18H30O2   | 21.12 | 278.4296 | 277.2149 | Negative | [M-H] <sup>-</sup> | 253, 235, 221, 197, 183, 179, 161, 113, 89 |
| 95  | Linolenic acid derivative isomer I                          | C33H56O14  | 21.13 | 676.8000 | 675.3592 | Negative | [M-H] <sup>-</sup> | 415, 397, 277, 235, 89                     |
| 96  | Linolenic acid derivative isomer II                         | C33H56O14  | 21.42 | 676.8000 | 675.3744 | Negative | [M-H] <sup>-</sup> | 415, 397, 277, 235, 89                     |
| 97  | Arachidonic acid                                            | C20H32O2   | 21.66 | 304.4669 | 305.2474 | Positive | [M+H] <sup>+</sup> | 121                                        |
| 98  | Monogalactosylmonoacylglycerol (MGMG 18:3)                  | C27H46O9   | 22.28 | 560.3103 | 559.3075 | Negative | [M-H] <sup>-</sup> | 513, 277, 253, 235                         |
| 99  | Dirhamnosyl linolenic acid                                  | C28H48O11  | 22.48 | 560.3124 | 559.3118 | Negative | [M-H] <sup>-</sup> | 277                                        |
| 100 | Hydroxy octadecadienoic acid                                | C18H32O3   | 22.69 | 296.4510 | 295.2273 | Negative | [M-H] <sup>-</sup> | 277, 233, 195                              |
